# Supplementary material for: Chromosomal catastrophe is a frequent event in clinically insignificant prostate cancer
Source: PubMed Central journal article supplement (PMC4745713; doi:10.18632/oncotarget.4900), 2015-08-21
Supplement: oncotarget-06-29087-s001.pdf [file oncotarget-06-29087-s001.pdf]

## SUPPLEMENTARY INFORMATION

### Validation of selected rearrangements within chromothriptic event

Mate pair sequence reads for five events within chromothripsis on chromosome 4 (Supplementary Figure S3) for case PR6 were mapped to the human genome, and primers spanning the fusion junctions (sequences published in Murphy et al 2012, ref. 22) were used in validation PCRs as was previously described. DNA for PCRs was isolated from cells collected separately from GP3 and GP4 tumors, adjacent and distant normal tissue using laser capture microdissection. Amplification products we resolved on the gel (Figure 4 in Murphy et al, 2012, ref. 22), extracted and Sanger sequenced (below). The structure of rearrangements based on the sequence of amplified products is shown in Supplementary Figure S4.

### Sanger sequencing results of validated rearrangements

The sequences of two joined pieces (rearranged) and their corresponding chromosomal positions are listed below.

#### Rearrangement I

4 + 121954855 121955371

4 + 126358698 126358904

1. CCCNNTNNNCNTTAGCTGTTTTGNNNG ANANCTTTTACNAATTTATTCTGACTTCTATGATCT TTAATCTCTTTTCTACACCTGAAAAATAATAAAGA TTGTAAGACTAGATGTCTCAAAGATTCTTCCCTCC CCAGTGATACATGACTATACTGGGACTCTCTAAA TGCCCTGTGTCAACAGAGCTATCCTGAAGCTTA CTGAACACAAGGTGGTGTCTTCATATGAGCTTCT TCTAGTTCTTTTGTTAATTAAGAACAAGTTTTTG TTTTTGTCCCAGTTTAGCCAAATGCTCCTGAAA TAGAAATGCATTAGTAAATAAGAGCTTCATTTTA ATAGGTTTTCCCCTTTCTTTAGGAGTGATAGAAGT TTCATAATGTGATTTTCGTTTTCTAATAAATTCAA AAAGGCAAATTTCACTAGGGCCATGAAAGTATTC TTGGATTTATCCAGACTATGTA GAAACCACCATCACAGCTGGCTAAAAAGCAAAA GCTTGGTTAAATTGACTTGGCGTGG

2. ACTGAGAAATTTCTGTCCAGGGTCATAAC CCGTTTGAGTCATTGTACTTAGCACCACAGAG AGAGGCAGGTACAGCTGANCTGCTTCCAGGCTAT GAGCTGCACAANNACAGTCAATNAANCCCCTTTT ACTTGTCTTATNCCANAGCAAAGANATANAANA ATAAAANTCAAANAATAATATTCAATCCAAAGTC TNAGCTTANCAGTNGGAGTANACCNTGNNNATN AANTTGTGTGAANTNAATCCTGANTNTACATTTN

CTNTNGCCTTANNNTGNGCGNNNNNNNANTNTC TGGACCNNGTNTNAGGGNATTAGC

#### Rearrangement II

4 – 102288117 102288776

4 + 145213837 145214159

1. ANNNTGNGNATCTCCCTTCTCTCCNTGGA ATGGAGAGTGAACCTGGAGTTTGGTTTTCCCTCCC CTAAGTCAGTTGGCTTGATAAAACACTAGCAGATT AGGCTCTGGTTAACCAGTTTCTCTTAAGAGCATACT TTTGTTAAGAAAAACAGACTAGTGAGAATCTGGT TGAGTTCCTGGAGATAAACCTCACAAAAATGTGG AGGCCTCCCTGTGACTGGGTTTGTCTGGAATTTTT AACTTTCATACTTGAGCAATTAGTAGGTTACA GTT CAGGTTTTTCTACCCTAGCACTGCTTCCCCTAGAG TTTTCTGCTGTGATATGTTGTCATTTTTCTGTATCT GTCTGTCTGTCTCTCAAGTTTGGGGGCATCAGTTT TTCCTTTGACCTCAATTCTCTTAAAAATCCAGCAA CTGTTGATTTTTTTCAGTTTGTTCACCTTTTACTTG CTGTCAGGACAGAGTAAAGATTTCTTTCTTTCTT TTTTTTCTTTTTTTCTTTTTTTTTGACGGAGTCTT GCACTGTCACCCAAGCTGGAGTGCCGTGGCGTGA TCTCAGCTCACTGCAAGCTCCGCCTCCAGGGTTC ACACCATTCTCCTGCCTCAGCCTCCCAAGTAGCT GGGACTACAGGCGCCCCGCCACCACGCCTGGCTAA TTTTGTGTGTGTG

2. GAGAATATTTCTTTGTAATGAATAAATGAA CGTTAAAAATAAGCTAAGTATAACCAAGAAGCAAA TAAATCAAATTAATTTGGCTGAAAAGAAGTTTAT AAAATTGACATTTCCCCTAAACTAGCCTTTAAAT ACTAAAAAGACATAAATGCAAACATCACGTANA GTGAATAACNACACTGAGTGTCAGTTCTTTCTAG CTGTTTAGGTATGTGNAATGAAATGACCCATGGA TAANAAAAATACACACNTTGGTTCTGTAATGTGCA CTAATAATCTGAANCNNGGGCNGCCACACAAGT TCTAACACTTTGTGTTGNACACNNGGGNTTCCNC GGAAAAGGGGTNTAAGAANGGCCACA

#### Rearrangement III

4 + 146812565 146813253 689

4 – 121967662 121967956 295

1. TGTCTTTGACAACACCCTACAGCAATGT GCAGTAGAGAATGATCCATCATTACTTAGAGGATC TTTGATGAAAGTCAGTGACAAATGCCAAATGTA ACTCAGTGAAAGTACTCTCTGCTGGAGGTTAAGA CAAATGTTCTAAATATACACCTTTCTGGCTTGATGT GTGAGTGAAGGTTCAAGCCCATTTTCTAAAATGA TAGAGGTGTATATGTCAACGTTGTGTTGAAGACTC TGGTACCTGATAACAACATAACATAAATAAC TCATCTTGTGATTCTGGACAAAT

2. AGTTTCCTCCTGGATTTTGAGACAAAACC  
 CTTTGCATTAACGGAGTCAGCTAAAAAGATTTCC  
 ATCTAACTAAGTTTTCCCCATCTCATATAAGAGG  
 GACTCATGGATTCCAGTCAATTTTTCTGTACATGT  
 TTAGTGTAGGTTTGAGCTCCCCAGTTGTTTTAAT  
 AGGACATTGAAAATTATGTCCTTGGATGTTGGTA  
 AATGTAATCCTGGGAATTATGATAGCTCAAACAAT  
 GACAGCCTCAATGAGGACTACAGTCTTGTTAGAA  
 AGGGCCCCCAAGCCTCCCACAGGGCTAAATAAA  
 GTTAAAGGCCCGGTGCCTTCACTGTCTTCATGCC  
 TCCTACACGGTGTCTCTGTGTGTTCTCTTAGTTT  
 GCAAGCTGGAGGGTAAGGCAGTAACAGCCAAGG  
 GCAGTCTCTCCAGGAAGGGGAGCAGGTTCAACA  
 GCCCTCTCTTGGTGCTCAGTCCAGCAGCTCTTC  
 CTGAACTTGGCTTTCCTGCTTCTTGCTATCCCC  
 AGCCNTGCTTCTGAGTGCCCCAAGAAATGCGTC  
 ANCNCACAGGCCAGGCAGGCTGTTGCTCCNCTAT  
 AGGAGAGGACCGCCCTNCAGTAAATACATNATTT  
 GGATATCGAAGGTCTNTATGTCTGCCTTAAGNTCT  
 TGGCCTGAAAGTGGACATTACAGCTTCTGTNTGA  
 ATTCTACTTTTGTACCTGTAGTACTGNNANCCNN  
 ANGTTTCATCAATNGAGCNCNCANCNNTTCNCAA

#### Rearrangement IV

4 – 101807349 101808165 817  
 4 – 137883309 137883499 191

1. AACNNGNATAANNAATANCNGCAANCCN  
 ANGACGTTNAGCACNGTACACAATAGATAAGATN  
 TGGAAGCAATCTAAGTGTCCATCAGCAGATGAAT  
 GGANAAAAAATGTGATGCTTATACAAAATGGAG  
 TACTATTGAGCCAAAATAGTTAAAACCTGCAGTTA  
 CATCAGCATGAATCAAAGTGGAGACACCAACTGT  
 ACGTGTAGTCAATGCATTCTTCACTGC

2. AACACTGGAGCACAGATATATAAAGCAAA  
 TATTATTAGAGCTAAAGAGAGAGATAGGGCCCAA  
 TACAATACTAGCTGTAGACTACAACACCCTACTTT  
 CAGCATTGGACAGATCTCCCAGACAGAAAATCAA

CAAAGAAACAACAGACTTAATCTGCAATATAGAC  
 CAAATGGACCTAACAGATACTTATTGAACATTTGA  
 ACATTTTCATCCAATGGCTGCAGGTTACAAATTTCTT  
 TTCTCAGCACATGGATCATTGTCAAGGATAAATC  
 ATGTGTTAAGTCACAAAACAAGTCTTCAAACATT  
 TAAAAATAGTGAAATAATATGAAGCATCTTCTCTG  
 ACCACAATGGAATAAAACTAGAAATCAATAACAA  
 GAGGAATTTTGGAACTATACCAACACATGGAAG  
 TTAAACCATATGCTCCTGAATAACCAGTAGGTCAA  
 TGAAAAAATAAAGAAAGAATTGAATAAATTTATTG  
 AAACAAATGATAATGGAAACACAGCATATCAAAA  
 CCTGTGGAATACAGCAAAAAAAGGACTAAGAGG  
 GAAATTTACAGCTATAAGTACCTACATCAAAAA  
 GAAGAAAACTTCAAATGAACAACCTAACAATGC  
 ATCTTAAATAGCTNGAAAAGCAAGAGCAAACA  
 AA CTCAAATATAGTAGAAGAAAATAAATAATAAAT  
 AT CAGAGCAGAGATAACTTAATTTGACNTGANTA  
 AA ACAATACAAAAGATCAATAAAATGAAGTTTGT  
 TT TTCANAAAGATAAACAAAANTTGANCAANCT  
 GTN GATGGACTAANNAAAAAAGAGGGGAAGACTCA

#### Rearrangement V

4 + 107030113 107030327  
 4 + 146127590 146127768

1. TTGTATTNGTCTGTTGTCTGCTGCTAATAA  
 AGATTTACCTGAGACTGGGTAATTTATAAAGGAA  
 AGAAATTTAATGGGCTCACACATTACATGGCTG  
 GGGAGGCCTCACAATCATGGCAGAGGCAAAGGG  
 GAAGCAGAGGTACATCTTACATGGTGGCAGGCAA  
 GAGAGCT

2. CAACGACAACCAACCTGAAAGCAAAATC  
 AGAAAGGCAATCCCATTCACTGACACACACA  
 TACACACACACACACACACACACACACTCC  
 CTAGGAATACAGCACACCCGGGGGGTGAAGGAC  
 CCCTACAATGAGAATTACAAAACACTACTCAAAG  
 AAATCAGAAAAGACACAAACAATGGAAAGACA  
 TCCCATGCTATGGATCGGAGGGNNCAANANAAG

## SUPPLEMENTARY FIGURES AND TABLES

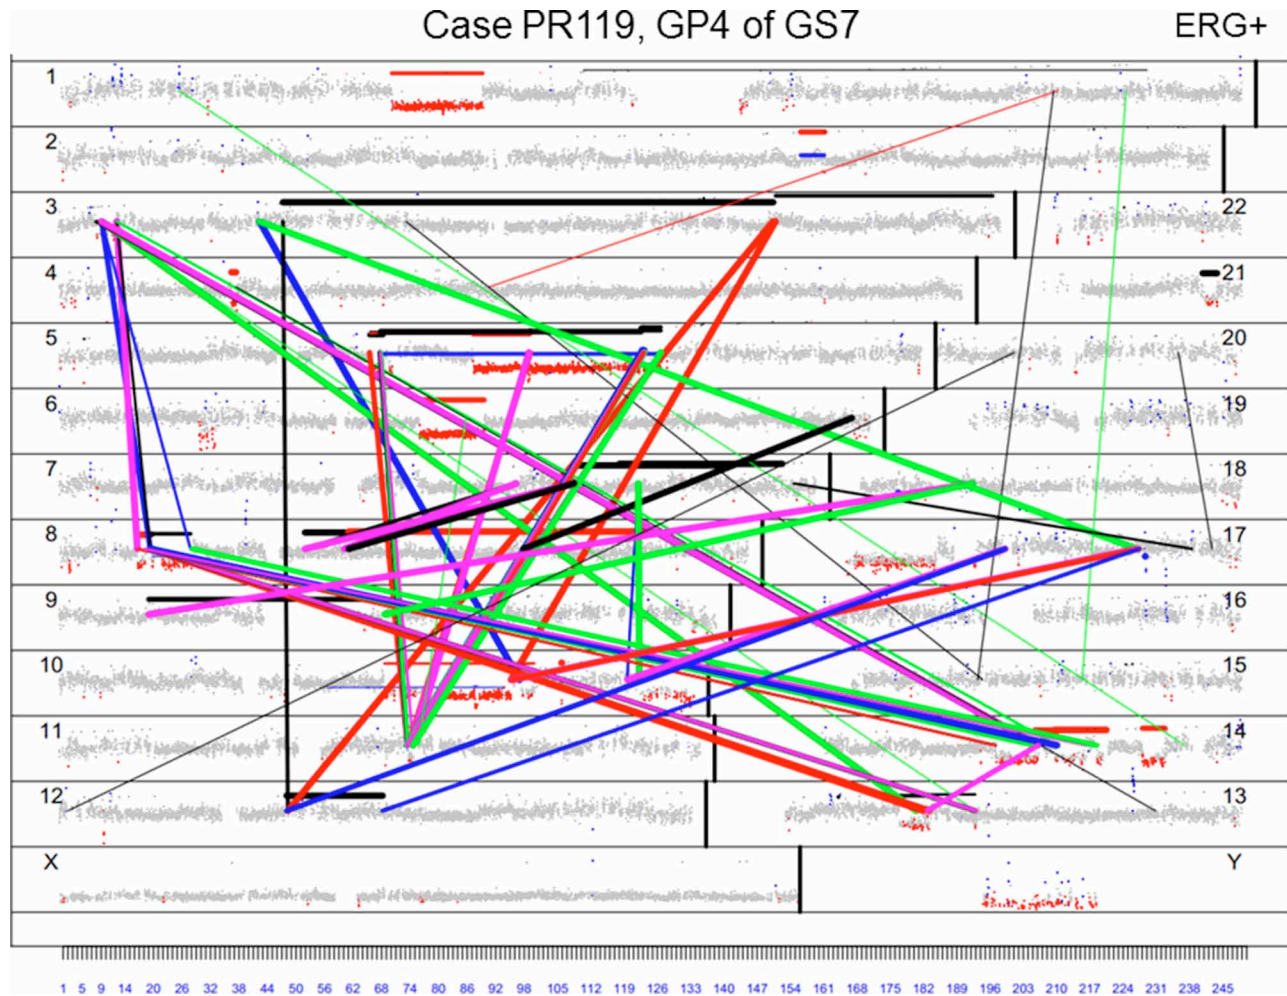

**Supplementary Figure S1: Genome plot of rearrangement landscape in representative prostate cancer case.** Count plots show frequency of distribution of reads in 30KB windows and breakpoints for all chromosomes (numbers are indicated). The X axis spans the length of the chromosome, the Y axis shows the number of reads for each window. Window counts are shown points colored according to the prediction of CNV algorithm. Black points are normal, red points correspond to deletions and green points show gains. Lines connect identified bioinformatically breakpoints. The widths of the lines correlate with number of associated mate-pair reads. Color of the connecting lines indicate polarity of the joined chromosome. For intra-chromosomal events red shows forward direction for both pieces, green indicates inversion for one partner and blue shows inversion for both. For inter-chromosomal events, red connects the p-side piece from the larger chromosome to the q-side piece of the smaller chromosome in forward direction, green connects the q-side piece from the larger chromosome to the p-side piece of the smaller chromosome in forward direction, blue connects the p-side piece from the larger chromosome to the p-side piece of the smaller chromosome in reverse direction and magenta connects the q-side piece from the larger chromosome to the q-side piece of the smaller chromosome in reverse direction. Black indicates balanced translocations.

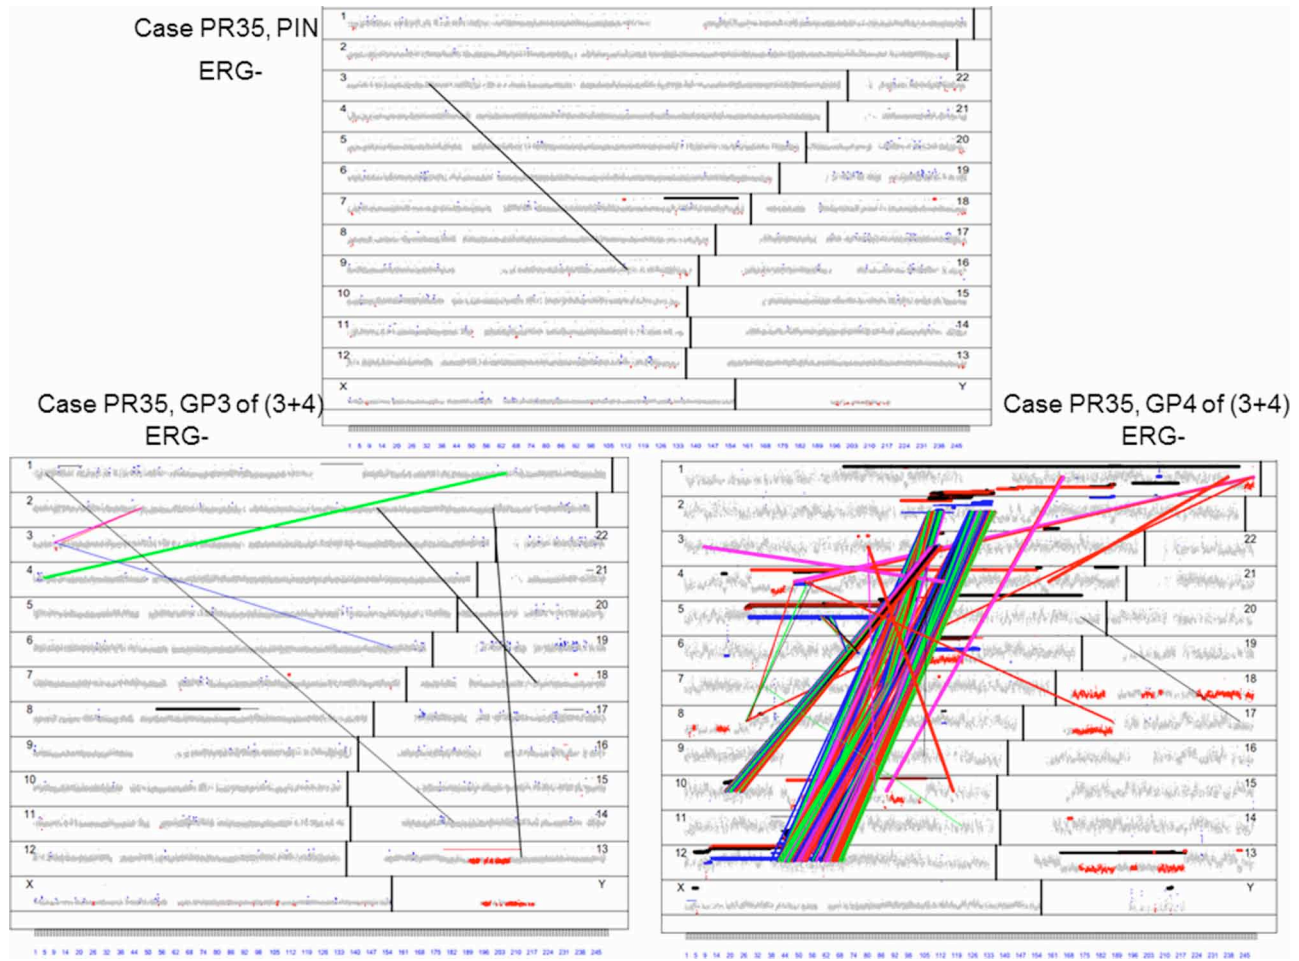

**Supplementary Figure S2: Genome plots of rearrangement landscape in representative prostate cancer case.** Count plots for PIN, GP3 and GP4 tumors of the same prostate cancer case. The designations are the same as in Supplementary Figure S1.



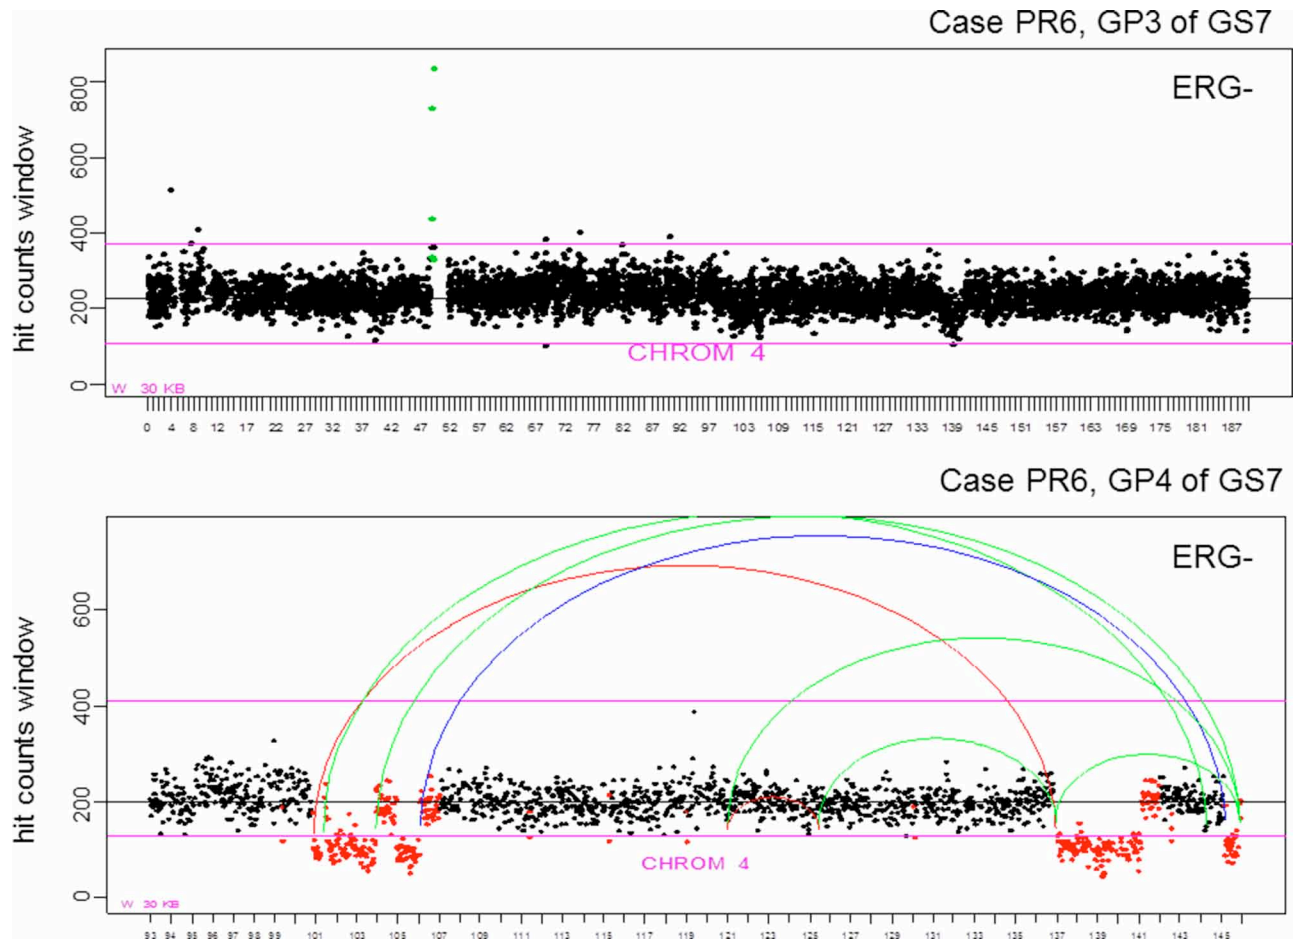

**Supplementary Figure S3: Representative count plots for adjacent GP3 and GP4 tumors.** Chromothripsis is present in GP4 (bottom) of GS7 (3+4) case (zoomed in area of chromosome 4) and absent in adjacent GP3 tumor (spans entire chromosome, top). Count plots show frequency distribution of reads in 30KB windows and breakpoints for indicated chromosome. The X axis spans the length of the chromosome, the Y axis shows the number of reads for each window. Window counts are shown by points colored according to the prediction of CNV algorithm. Black points are normal, red points correspond to deletions and green points show gains. Color of the connecting loops indicate polarity of the joined chromosomal pieces: red shows forward direction (concordant) for both pieces (represents deletions), green indicates switch in polarity (represents inversion) and blue indicates change in direction (gain). ERG status is indicated.

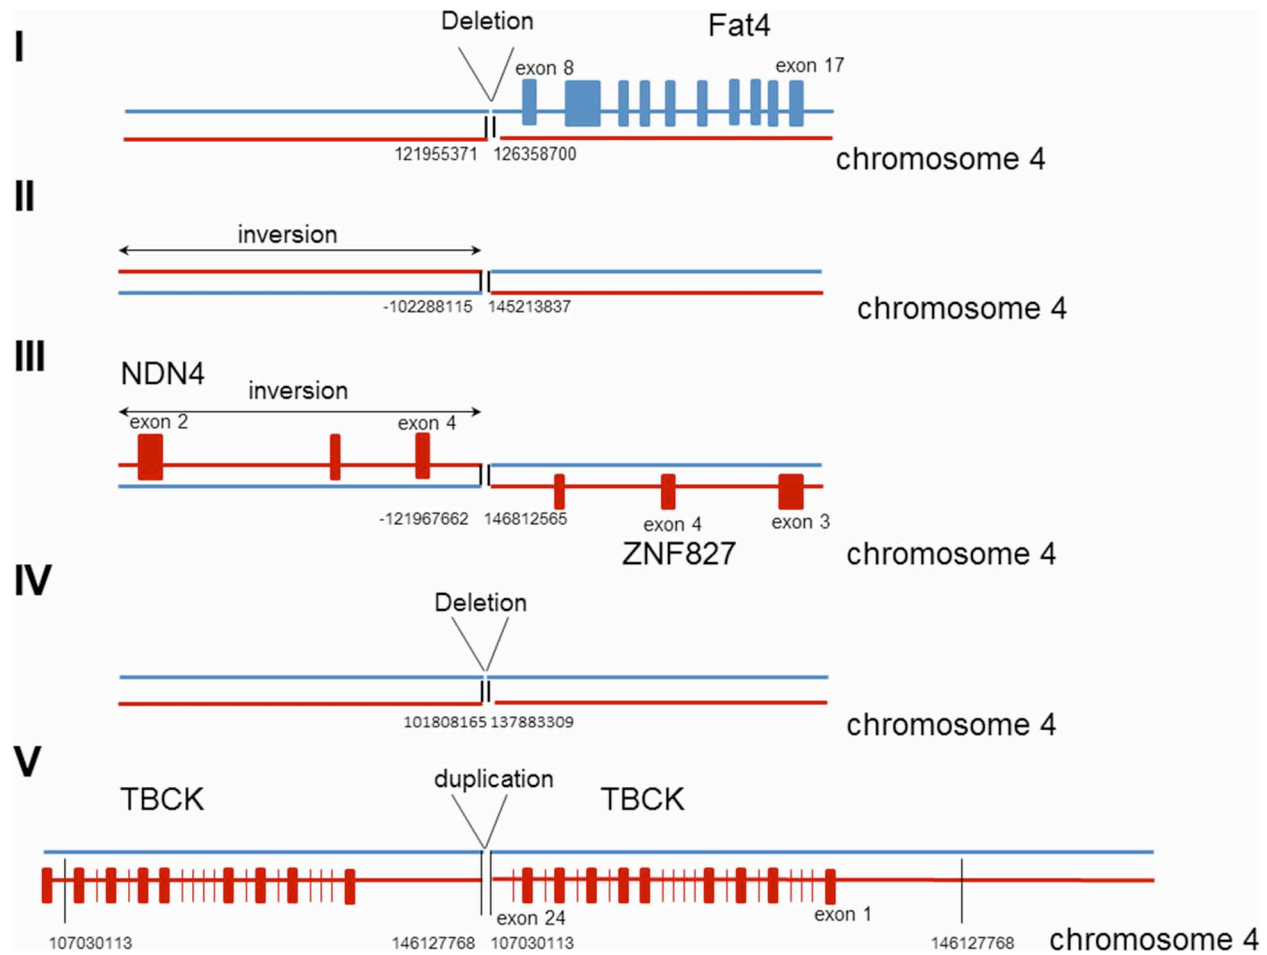

**Supplementary Figure S4: Schematic of validated rearrangements within chromothripsis for the case shown in Supplementary Figure S3.** Validation analysis of five selected breakpoints (designated I–V) identified by mate pair in GP4 of PR6 case. Representative gel images PCR products through selected breakpoints were published previously [22]. The schematic of validated breakpoints is based on Sanger sequencing results (described in Supplementary materials). Blue color codes for “+” strand, red color codes for “-” strand in the reference genome, exons are shown as boxes. The chromosomal positions are indicated by numbers. The genes that a “hit” are listed. Additional genes that have been deleted (in rearrangements I and IV) are presented in the Table S3.

**Supplementary Table S1: Chromothripsis and clinical outcome in prostate cancer**

| Group             | Years follow up<br>Mean+/- SD<br>(n) | # cases Systemic<br>Progression<br>(n, chromothripsis) | # cases Systemic<br>Progression<br>(complex) | # cases<br>PCa death<br>(chromothripsis) | # cases PCa<br>death (complex) |
|-------------------|--------------------------------------|--------------------------------------------------------|----------------------------------------------|------------------------------------------|--------------------------------|
| GS6 insignificant | 8.1 + 2.38 (31)                      | 0                                                      | 0                                            | 0                                        | 0                              |
| GS6 Large volume  | 6.54 + 1.3 (22)                      | 0                                                      | 0                                            | 0                                        | 0                              |
| GS7 (total)       | 7.86.31 + 3.96 (16)                  | 4(1)                                                   | 4(3)                                         | 0                                        | 0                              |
| GS7 (3+4)         | 5.88 + 5.81 (9)                      | 3(1)                                                   | 3(2)                                         | 0                                        | 0                              |
| GS7 (4+3)         | 7.1 + 2.35 (7)                       | 1(0)                                                   | 1(1)                                         | 0                                        | 0                              |
| GS8+ (total)      | 7.5 + 1.2 (23)                       | 7(4)                                                   | 7(5)                                         | 3(1)                                     | 3 (3)                          |

**Supplementary Table S2: Quantification of chromothriptic events across all Gleason grades**

| Group              | Number of caseswith<br>2 hits* | Number of caseswith<br>3 hits* | Number of caseswith<br>4 hits* |
|--------------------|--------------------------------|--------------------------------|--------------------------------|
| Insignificant, GS6 | 4                              | 1                              | 0                              |
| Large volume, GS6  | 1                              | 1                              | 0                              |
| GP3 of GS7         | 2                              | 1                              | 0                              |
| GP4 of GS7         | 3                              | 1                              | 1                              |
| GS8 and GS9        | 4                              | 0                              | 0                              |

\*Hit represents number of chromosomes on which catastrophe is observed

**Supplementary Table S3: List of affected by chromothripsis (Supplementary Figure S3) genes in case PR6**

| Gene name | Gene name | Gene name |
|-----------|-----------|-----------|
| ABCE1     | HSPA4     | SGMS2     |
| ADAD1     | IL15      | SLC10A7   |
| AGXT2L1   | IL21      | SLC7A11   |
| AIMP1     | INFP4B    | SLC9B1    |
| AK2       | LARP1B    | SLC9B2    |
| AK2       | LARP7     | SMARCA5   |
| ALPK1     | LEF1      | SMS2      |
| ANAPC10   | LFCDH10   | SPATA5    |
| ANKRD50   | LRIT3     | SPRY1     |
| ANXA5     | MAD2L1    | SYNPO2    |
| AP1AR     | MAML3     | TACR3     |
| ATHGEF38  | MANBA     | TBCK      |
| BANK1     | METL14    | TBC1D9    |
| ARSJ      | MFSD8     | TET2      |
| BBS12     | MGARP     | TIFA      |
| BBS7      | MGST2     | TMEM155   |
| BDH2      | NAA15     | TNIP3     |
| CAMK2D    | NDNF      | TRAM1L1   |
| CASP6     | NDST4     | TRPC3     |
| CCRN4L    | NDUFC1    | UBE2D3    |
| CENPE     | NEUROG2   | UCP1      |
| CFI       | NFKB      | UGT8      |
| Col25A1   | NPNT      | USP38     |
| CXXC4     | NUDT6     | USP53     |
| CYP2U1    | OSTC      |           |
| DKK2      | OTUD4     |           |

(Continued)

| Gene name | Gene name | Gene name |
|-----------|-----------|-----------|
| EGF       | PAPSS2    |           |
| ELF2      | PCDH18    |           |
| ELMOD2    | PDE5A     |           |
| ELOVL5    | PGRMC     |           |
| ENPEP     | PHF17     |           |
| EXOSC9    | PITX2     |           |
| FABP2     | PLA2G12A  |           |
| FABPC4L   | PRDM5     |           |
| FAT4      | PRSS12    |           |
| FGF2      | QRFPR     |           |
| FLK4      | RAB33B    |           |
| FREM3     | RNF150    |           |
| GAB1      | RPL34     |           |
| GAR1      | RRH       |           |
| GSTCD     | SCL1T     |           |
| GYPA      | SCOC      |           |
| GYPB      | SEC24B    |           |
| GYPE      | SEC24D    |           |
| HADH      | SETD7     |           |
| HADH      | SETD7     |           |
